# Supplementary material for: A functionalized biological heart valve by double bond crosslinking with enhanced biocompatibility and antithrombogenicity
Source: Royal Society of Chemistry journal article supplement (doi:10.1039/d2tb02218d), 2022-01-01
Supplement: d2tb02218d2.pdf [file d2tb02218d2.pdf]

## A functionalized biological heart valve by double bond crosslinking with enhanced biocompatibility and antithrombogenicity

Cheng Zheng<sup>a</sup>, Dajun Kuang<sup>b</sup>, Kailei Ding<sup>a</sup>, Xueyu Huang<sup>a</sup>, Hongsong Fan<sup>a</sup>, Li Yang<sup>a,\*</sup>, Yunbing Wang<sup>a</sup>, Xingdong Zhang<sup>a</sup>

<sup>a</sup>National engineering research center for biomaterials, Sichuan University

<sup>b</sup>Venus Medtech (Hangzhou) Inc.

\*Correspondence author at: National Engineering Research Center for Biomaterials, Sichuan University, No. 29 Wangjiang Road, Chengdu 610064, China. Tel: +86 28 85415280; Fax: +86 28 85410246; E-mail: [yanglisc@scu.edu.cn](mailto:yanglisc@scu.edu.cn) (Dr. Li Yang)

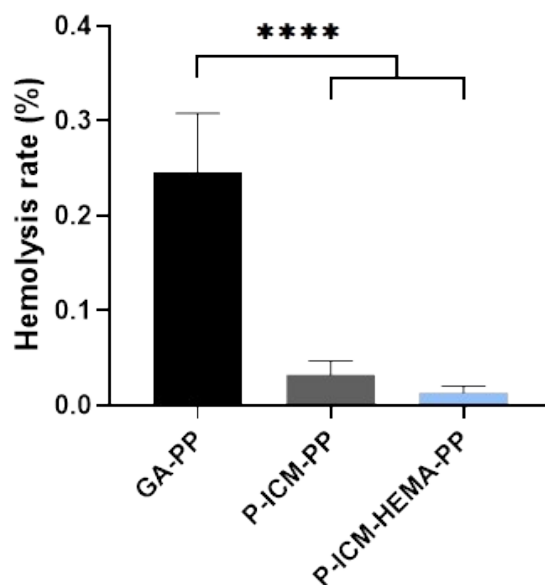

Figure S1. Hemolysis rate of PICM-HEMA-PP, PICM-PP and GA-PP, \*\*\*\* P<0.0001.

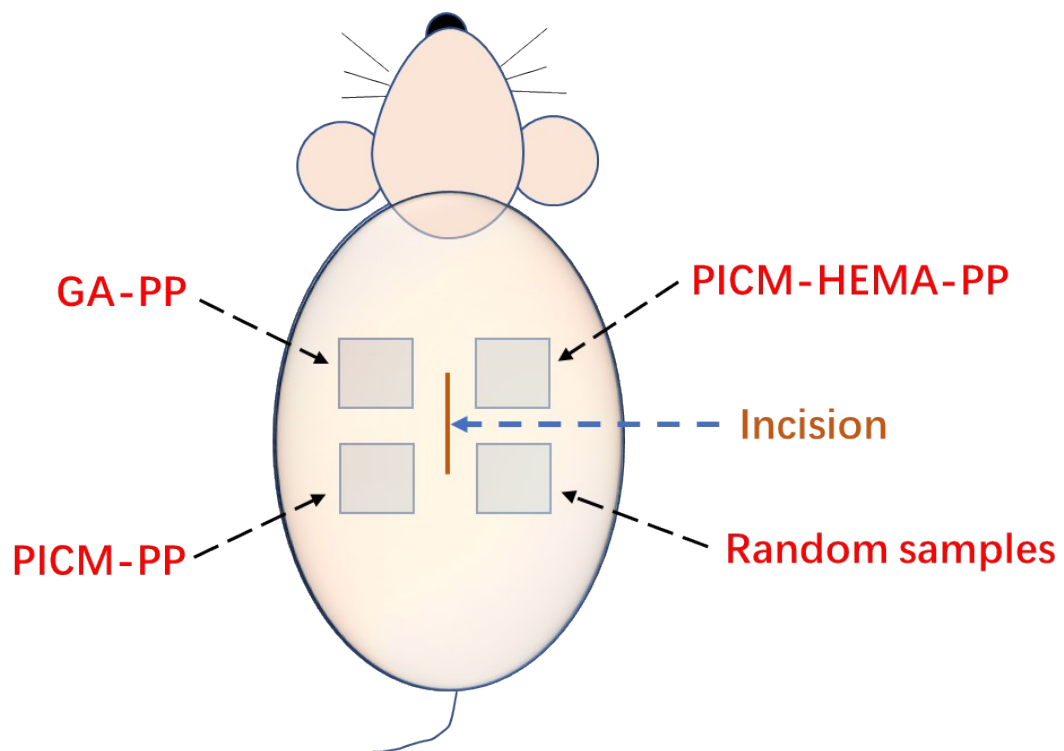

Figure S2. The schematic illustration of rat subcutaneous implantation.
